# Supplementary material
Source: ML conference proceedings conference paper supplement (https://openreview.net/forum?id=lf7gguJgpq)
Supplement: supplementary_material [file attachment]

## A EVENTS GENERATION

The event stream  $E$  consists of a set of event  $e = (x, y, t, p)$ , where each event is triggered and recorded when the brightness change at pixel  $(x, y)$  exceeds a certain threshold  $C$ . The time interval between events is denoted as  $\Delta t_e$ , which is a short period, and the brightness at position  $\mathbf{x} = (x, y)$  is represented as  $F(\mathbf{x}, t)$ . The brightness change can be calculated as  $\Delta b = \log(F(\mathbf{x}, t_e)) - \log(F(\mathbf{x}, t_e - \Delta t_e))$ . The output signal  $p$  is determined by Eq. 8.

$$p = \begin{cases} 1, & \Delta b > C \\ 0, & \text{others} \\ -1, & \Delta b < -C \end{cases} \quad (8)$$

## B THE ENCODING NETWORK STRUCTURE

The encoder serves as the core component of our architecture, drawing inspiration from eSL-Net(Wang et al., 2020). However, we have made modifications to its structure by excluding the decoding segment responsible for upsampling. Consequently, we retain solely the feature extraction module, as illustrated in Fig. 11, and the code of the encoder is shown in Code (Listing. 1).

The encoder receives inputs, rolling shutter blur image  $I_{rsb}$ , and events  $E$ . The image  $I_{rsb}$  has the shape of  $H \times W \times 1$  or  $H \times W \times 3$ , corresponding to grayscale and RGB image, respectively. Moreover, the event  $E$  is transformed into count images (Zheng et al., 2023), with the shape of  $H \times W \times M$ , where  $M$  denotes the number of temporal divisions within the event stream. The encoder produces a high-dimensional tensor as output  $\theta$ , with the shape of  $H \times W \times C$ .

The encoder can be decomposed into two constituent components: data preprocessing and spatio-temporal information modeling. During the preprocessing stage, the image undergoes a convolution operation to augment the channel dimensionality, while the event data is transformed into a high-dimensional Tensor using two convolutions followed by a Sigmoid activation. Subsequently, the processed tensors from the image and event data are subjected to the sparse learning module. Within the sparse learning module, both image features and event features undergo iterative cycles to derive spatio-temporal representations  $\theta$ . In contrast to the original approach eSL-Net (Wang et al., 2020), we aim to incorporate deformable convolutions (Wang et al., 2022a) into this loop, thereby enhancing the motion estimation and correction capabilities throughout the iterations.

## C MORE EXPLANATION AND DISCUSSION

Due to the constraints of the main paper’s length, this supplementary section provides additional experimental details and discussions. Specifically, we elaborate on the following 11 aspects to offer readers a more comprehensive understanding of our approach:

C.1 Further Details on the Dataset

C.2 Extended Discussion on Inference Speed

C.3 Additional Insights into the Real-World Dataset

C.4 Correlation Between PSNR and Interpolation Frame Index

C.5 Advanced Operations in Exposure Time Embedding

C.6 Comparative Studies Across Different Exposure Times

C.7 Detailed Comparisons with Other Methods

C.8 Visualization of Temporal Dimension Gradients

C.9 Analysis of PSNR and SSIM Across Different Interpolation Multiples

C.10 Efficacy of the DCN

C.11 Exploring Why DeblurSR Appears to Correct Rolling Shutter

### C.1 FURTHER DETAIL ON THE DATASET:

**1) Gev-RS dataset** (Zhou et al., 2022) contains original videos shot by GS high-speed cameras with  $1280 \times 720$  resolution at 5700 fps. However, EvUnroll (Zhou et al., 2022) primarily focuses on RS correction, and provided by EvUnroll Gev-RS dataset does not include RS frames with severe motion blur. Therefore, we reconstruct RS frames with severe motion blur and events from original videos. We initially downsample the original videos to DAVIS346 event camera’s resolution ( $260 \times 346$ ) (Scheerlinck et al., 2019). Then, we employ the event simulator vid2e (Gehrig et al., 2020) to synthesize events from the resized frames. We simulate RS blur frames by first generating RS sharp frames as the same RS simulation process of Fastec-RS (Liu et al., 2020) and then averaging 260 RS sharp frames after gamma correction. We use the same dataset split as EvUnroll (Zhou et al., 2022), with 20 videos used for training and 9 videos used for testing. The total amounts of RS blur frames in Gev-RS (Zhou et al., 2022) dataset are 784 in the training set and 441 testing set.

**2) Fastec-RS dataset** (Liu et al., 2020) provides the original frame sequences recorded by the high-speed GS cameras with the resolution of  $640 \times 480$  at 2400 fps. We use the same settings to resize frame sequences, create events, and RS blurry frames. Furthermore, we use the same dataset split strategy as Fastec-RS (Liu et al., 2020): 56 sequences for training and 20 sequences for testing. Specifically, this dataset includes 1620 RS blur frames for training and 636 RS blur frames for testing.

**3) Real-world dataset** (Zhou et al., 2022) currently the sole real dataset accessible, comprises four videos. Among these, two capture outdoor scenes, while the other two focus on indoor scenes. Each video pairs rolling shutter frames with events; the events are derived from DVS346. However, given the absence of ground truth in this dataset, it can only provide quantitative visualization results.

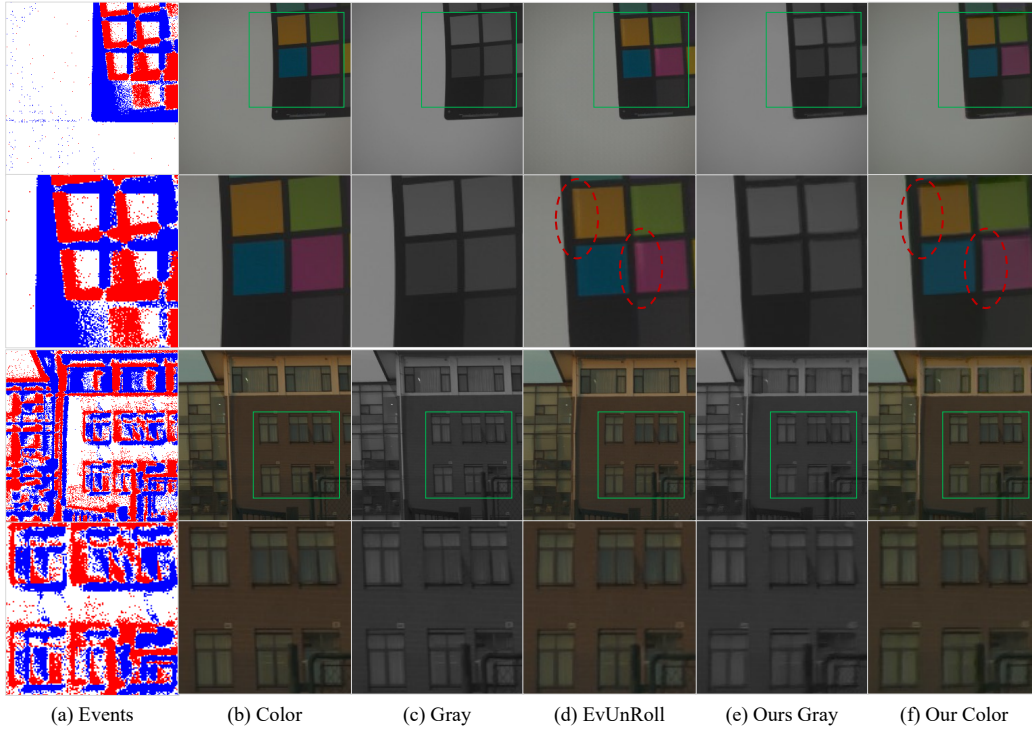

Figure 6: Visualization results in a real-world dataset (Zhou et al., 2022). (a) is the events visualization results. (b) (c) are the input RGB and gray images that have clear rolling shutter distortions. (d) is the output of EvUnRoll. (e) (f) are the outputs of our method.

### C.2 EXTENDED DISCUSSION ON INFERENCE SPEED:

Fig. 5 illustrates the inference time of our method with a wide range of interpolation multiples spanning from  $1\times$  to  $31\times$ , including the total inference time and the average inference time per

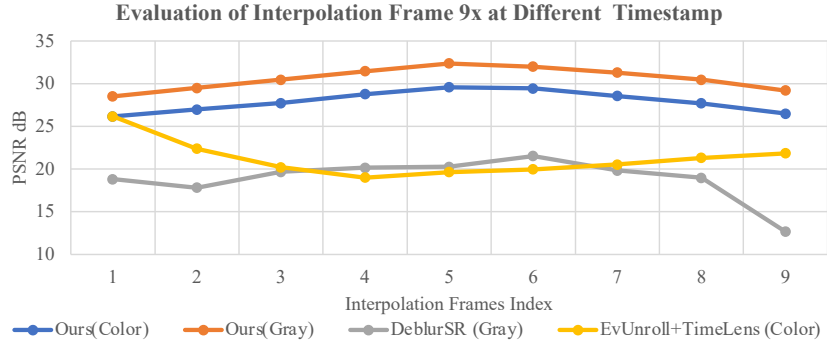

Figure 7: The  $x$ -axis corresponds to the subscript of the frame interpolation result achieved through 9-fold interpolation, while the  $y$ -axis represents the PSNR value associated with each frame. A higher PSNR value indicates a higher reconstruction quality.

frame. Importantly, the total inference time increases gradually as the frame interpolation multiple increases. For instance, when going from  $1 \times$  to  $31 \times$  frame interpolation, the total inference time only increases from  $30.8 \text{ ms}$  to  $86.9 \text{ ms}$ . This signifies a mere 2.8-fold increase in time despite a 31-fold increase in the interpolation multiple. Additionally, it is notable that the average inference time per frame decreases with higher frame interpolation multiples. At  $31 \times$  frame interpolation, the average time per frame is a mere  $2.8 \text{ ms}$ .

Our method exhibits distinct advantages over the EvUnRoll (Zhou et al., 2022) and TimeLens (Tulyakov et al., 2021) cascade approaches, particularly in terms of computational efficiency. Specifically, when the focus is solely on RS frame correction and deblurring, the inference time for EvUnRoll is measured at  $42.3 \text{ ms}$ , while our approach necessitates only 72% of that time. This computational advantage becomes even more pronounced during high-magnification frame interpolation. For instance, in scenarios requiring  $N$ -times interpolation, the cascading strategy calls for two invocations of EvUnRoll and  $(N - 2)$  of TimeLens, with the latter having a time cost of  $(t_{TL} = 186.76 \text{ ms})$ . Consequently, our method offers a significant advantage in high-magnification frame interpolation scenarios. It is crucial to note that our inference time calculations are restricted to GPU-based computations, intentionally omitting the time required for data loading and storage. In practical applications, the EvUnRoll and TimeLens cascade introduces additional disk I/O overhead, thereby further exacerbating its time consumption.

### C.3 ADDITIONAL INSIGHTS INTO THE REAL-WORLD DATASET:

The visualization results for the real-world dataset can be seen in Fig. 6. The input frame, which displays a rolling shutter pattern, is characterized by clear distortions in dynamic scenes. For example, the palette’s edges are curved, and the building windows tilt. In contrast, events display global shutter characteristics, as evidenced by the lack of distorted edges in the event visualizations. Both our method and EvUnRoll effectively correct the rolling shutter distortion, whether it’s the distortion of the palette’s edge or the deformation of building windows. However, due to the absence of ground truth, quantitative analysis remains unattainable. It’s worth noting that while EvUnRoll exhibits some artifacts in the palette scenarios, our method remains artifact-free. By concurrently addressing RSC, Deblur, and VFI, our method avoids accumulating errors, leading to a more artifact-free outcome.

### C.4 CORRELATION BETWEEN PSNR AND INTERPOLATION FRAME INDEX

Fig. 7 illustrates the PSNR values for each frame obtained through various methods using 9-fold frame interpolation. Our proposed method demonstrates superior performance. Specifically, the intermediate image attains the highest quality, while the reconstruction quality diminishes towards both the beginning and end of the exposure, displaying a symmetrical pattern. To further enhance image quality across the entire frame, future investigations could explore the integration of multi-frame algorithms.

Table 5: More operation studies for exposure time embedding. (Gray blur frame as inputs in 1, 3, 5, 9 times frame interpolation).

|    | Time Embedding Type | PSNR         | SSIM          |
|----|---------------------|--------------|---------------|
| 1× | Add                 | 33.12        | <b>0.9881</b> |
|    | Multiplication      | <b>33.15</b> | 0.9757        |
|    | Concat              | <b>33.15</b> | 0.9876        |
| 3× | Add                 | 31.11        | <b>0.9738</b> |
|    | Multiplication      | 31.10        | 0.9635        |
|    | Concat              | <b>31.14</b> | 0.9710        |
| 5× | Add                 | 30.84        | <b>0.9673</b> |
|    | Multiplication      | <b>30.96</b> | 0.9684        |
|    | Concat              | 30.89        | 0.9632        |
| 9× | Add                 | 30.54        | 0.9579        |
|    | Multiplication      | 30.74        | <b>0.9592</b> |
|    | Concat              | <b>30.77</b> | 0.9538        |

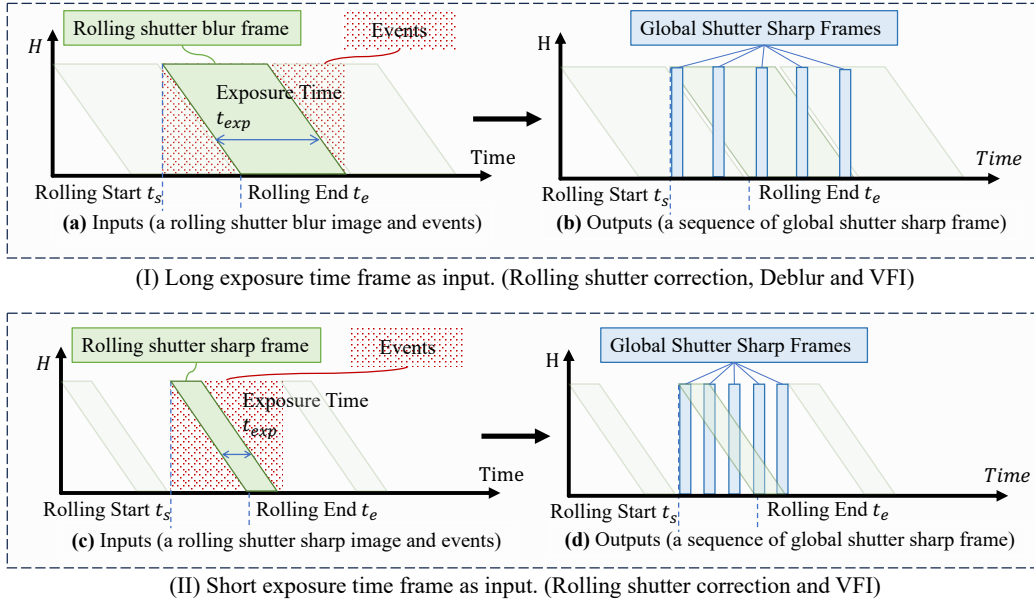

Figure 8: The schematic diagram elucidates the methodologies for correcting and interpolating rolling shutter (RS) frames under varying exposure durations. Subfigure (I) delineates the procedure for long-exposure RS frames, where the presence of blur is a significant factor to be addressed. In contrast, Subfigure (II) outlines the approach for short-exposure RS frames, thereby eliminating the necessity for deblurring.

## 597 C.5 MORE OPERATIONS IN EXPOSURE TIME EMBEDDING

598 We perform more experiments on Gev-RS dataset (Zhou et al., 2022) to validate the effect of  
 599 element-wise addition, multiplication, and concatenation in Eq. 6. The quantitative result is shown  
 600 in Tab. 5, and we find that concatenation and multiplication have higher PSNR than element-wise  
 601 addition.

## 602 C.6 COMPARATIVE STUDIES ACROSS DIFFERENT EXPOSURE TIMES

603 Our model performs reliably with different exposure times. Tab. 1 highlighted results under long  
 604 exposure scenarios (blurred rolling shutter frames). Tab. 6 shows our model’s efficacy in short  
 605 exposure scenarios (sharp rolling shutter frames). These findings affirm the model’s robustness in  
 606 different exposure times under the rolling shutter pattern.

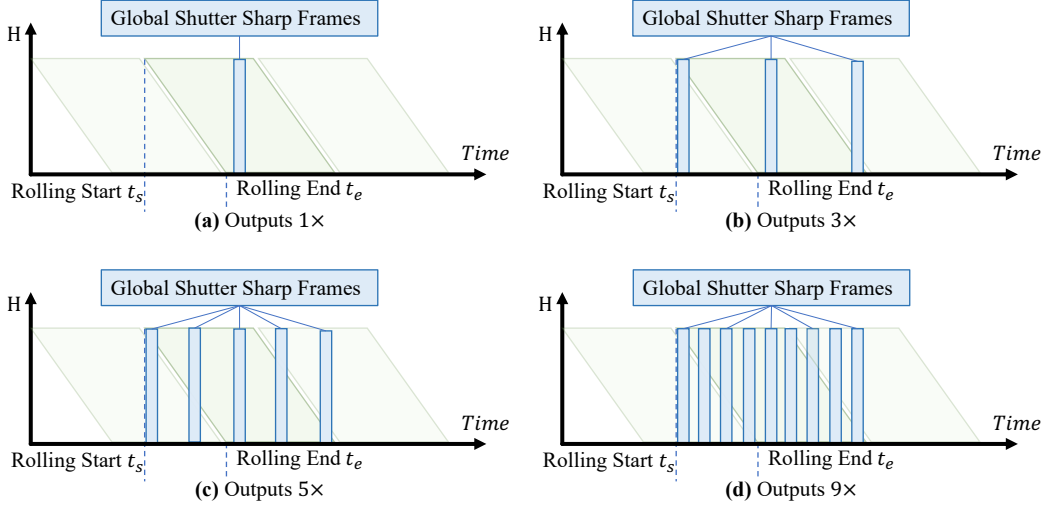

Figure 9: Schematic diagram of frame insertion at different magnifications

Table 6: Experiments on short exposure times.

| Method   | Exposure Time | Interpolation Frames | PSNR         | SSIM          |
|----------|---------------|----------------------|--------------|---------------|
| EvUnroll | short         | 1                    | 28.56        | 0.9026        |
| Ours     | short         | 1                    | <b>29.65</b> | <b>0.9457</b> |
| Ours     | short         | 3                    | 28.88        | 0.9364        |
| Ours     | short         | 5                    | 28.89        | 0.9457        |
| Ours     | short         | 9                    | 28.20        | 0.9037        |

### 607 C.7 DETAILED COMPARISONS WITH OTHER METHODS:

Table 7: Comparison of our method with prior works.

| Methods   | Publication | Frames | Color | Events | Deblur | RS Correction | VFI |
|-----------|-------------|--------|-------|--------|--------|---------------|-----|
| JCD       | CVPR 2021   | 3      | ✓     | ✗      | ✓      | ✓             | ✗   |
| eSL-Net   | ECCV 2020   | 1      | ✗     | ✓      | ✓      | ✗             | ✗   |
| eSL-Net*  | ECCV 2020   | 1      | ✗     | ✓      | ✓      | ✓             | ✗   |
| EvUnroll  | CVPR 2022   | 1      | ✓     | ✓      | ✓      | ✓             | -   |
| TimeLens  | CVPR 2021   | 2      | ✓     | ✓      | ✗      | ✗             | ✓   |
| E-CIR     | CVPR 2022   | 1      | ✗     | ✓      | ✓      | ✗             | ✓   |
| VideoINR  | CVPR 2022   | 2      | ✓     | ✗      | ✗      | ✗             | ✓   |
| EvShutter | CVPR 2023   | 1      | ✗     | ✗      | ✓      | ✓             | ✗   |
| DeblurSR  | Arxiv 2023  | 1      | ✗     | ✓      | ✓      | ✗             | ✓   |
| NEIR      | Arxiv 2023  | 1      | ✓     | ✓      | ✓      | ✓             | ✓   |
| Ours      | -           | 1      | ✓     | ✓      | ✓      | ✓             | ✓   |

608 In this section, we will explain the motivations for comparing EvUnroll (Zhou et al., 2022) (event-  
 609 guided RS correction) in the experiment that outputs a single GS sharp frame and comparing EvUnroll  
 610 + Timelens (Tulyakov et al., 2021) (event-guided video frame interpolation) in the experiment that  
 611 outputs a sequence of GS sharp frames. Fig. 10 (I) shows the process of generating a sequence of  
 612 global shutter sharp (GS) frames from a rolling shutter (RS) blur image and paired events by deblur  
 613 and RS correction. However, the deblur module in EvUnroll recovers the midpoint of the exposure  
 614 time of each row (Zhou et al., 2022), as shown in Fig. 10 (b); furthermore, EvUnroll can only recover  
 615 the GS sharp frames between the rolling start time  $t_s^m$  and rolling end time  $t_e^m$  of the reconstructed  
 616 RS sharp frame, which can not output the arbitrary GS sharp frames during the whole exposure time  
 617 of the RS blur frame. Therefore, in the joint task of deblur and RS correction, EvUnroll can not

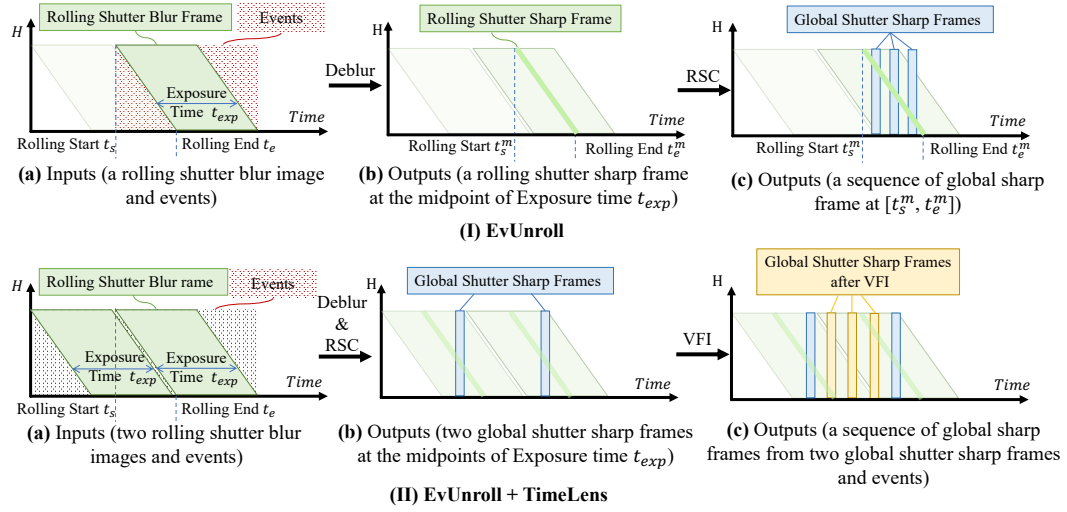

Figure 10: Illustration of Experiment Settings of EvUnroll (Zhou et al., 2022) and the combination of EvUnroll and TimeLens (Tulyakov et al., 2021).

618 realize arbitrary frame interpolation as shown in Tab. C.7 and we combine EvUnroll and TimeLens  
 619 in the experiment outputting a sequence of GS sharp frames. Specifically, we first generate two GS  
 620 sharp frames with EvUnroll at the midpoint of the whole exposure time  $t_{exp}$  from two RS blur frames  
 621 and paired events, and then we use TimeLens to generate latent GS sharp frames with the input of  
 622 two GS sharp frames and events, as shown in Fig. 10 (II).

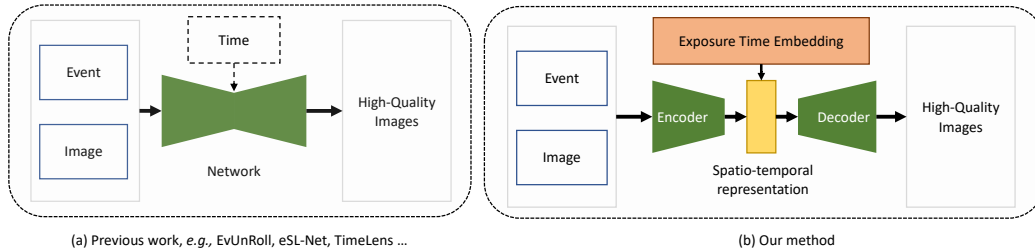

Figure 11: Differences between our method and previous methods. In contrast to the previous method, our approach introduces spatio-temporal representation and exposure time embedding. The spatio-temporal representation involves capturing all the spatio-temporal information during the exposure time. Furthermore, specific exposure time information is embedded, which enables the decoder to generate a frame with high-quality.

623 Compared with the latest research VideoINR (Chen et al., 2022), our work differs in two aspects.  
 624 **a)** Different research questions: While VideoINR tackles space-time super-resolution in the global  
 625 shutter by introducing implicit neural representation (INR), our proposed method first simultaneously  
 626 realizes RS correction, deblurring, and frame interpolation with INR. **b)** Different methodologies:  
 627 *i.* VideoINR consists of SpatialINR and TemporalINR, which are sequentially used to transfer the  
 628 frame feature according to the spatial-temporal coordinate to achieve super-resolution and frame  
 629 interpolation. However, SpatialINR, and TemporalINR cannot handle motion blur and rolling shutter  
 630 distortion in the input frames. *ii.* In contrast, our approach develops a unified INR to simultaneously  
 631 realize RS correction, deblurring, and frame interpolation. Especially, according to the principle of  
 632 RS and GS images, we design Exposure Time Embedding enabling the generation of RS and GS  
 633 images given the specific exposure time information, which is a feat unachievable by VideoINR due  
 634 to its inconsideration towards RS distortion and blur.



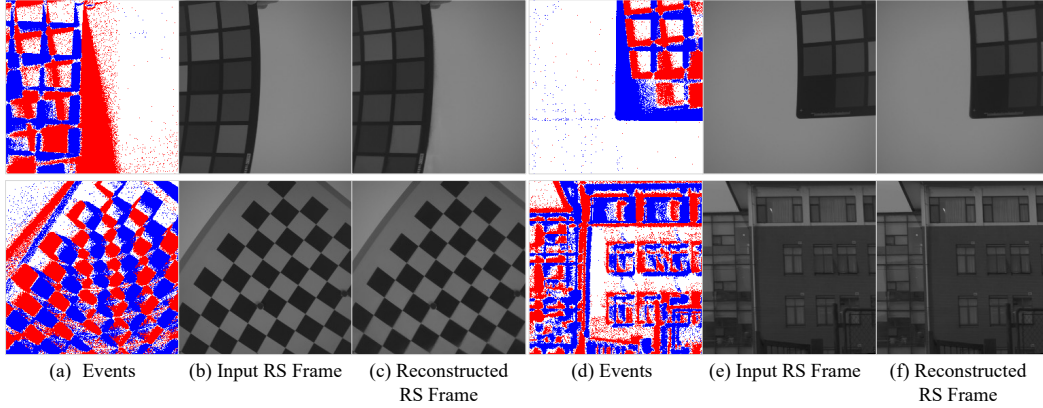

Figure 12: Rolling shutter frame reconstruction visualization in real-world dataset.

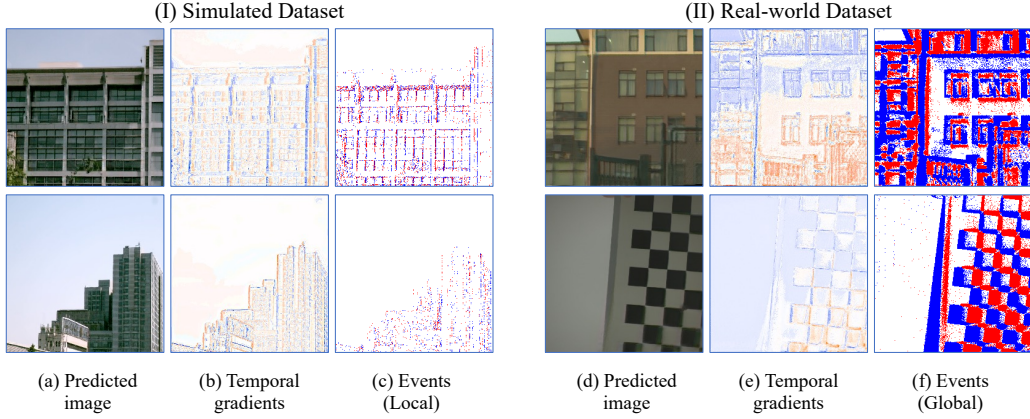

Figure 13: (I) and (I) show visualizations on simulated and real-world datasets, respectively. From left to right: the predicted images, temporal gradients ( $\partial F(\mathbf{x}, t, \theta) / \partial t$ ), and events. Orange and blue hues in the image signify positive and negative gradients, respectively. The color intensity is associated with the gradient value, with higher absolute values manifested by stronger colors.

#### 635 C.8 VISUALIZATION OF TEMPORAL DIMENSION GRADIENTS:

636 Fig. 13 depicts the visualization of the gradients in the temporal dimension, demonstrating the  
 637 successful training of the function  $F(\mathbf{x}, t, \theta)$ . Both the gradient visualization and events exhibit  
 638 a similar intensity trend for  $F(\mathbf{x}, t, \theta)$  at the specified time  $t$ . However, the gradient visualization  
 639 appears smoother with more continuous edges. This observation confirms that our method is capable  
 640 of learning the high temporal resolution of intensity changes present in events, simultaneously filtering  
 641 out noise.

#### 642 C.9 ANALYSIS OF PSNR AND SSIM ACROSS DIFFERENT INTERPOLATION MULTIPLES:

643 In Tab. 1 of the main manuscript and Tab. 6 in supplementary material, we observe an intriguing  
 644 discrepancy in the PSNR and SSIM metrics for  $3\times$  and  $5\times$  color frame interpolations, registering  
 645 values of 28.36 and 0.9062, and 28.41 and 0.9062, respectively. Contrary to conventional wisdom,  
 646 which posits that an increase in frame rate interpolation should correspondingly degrade PSNR  
 647 and SSIM metrics when the model architecture remains constant, our findings deviate from this  
 648 expectation. We attribute this anomaly to the network’s varying predictive accuracy across the  
 649 temporal spectrum. Specifically, edge frames pose a greater challenge for the network compared  
 650 to those situated centrally. As illustrated in Fig. 7, for a  $3\times$  frame insertion, the terminal global

Table 8: Ablation for deformable convolution (DC).

| Interpolation multiple | DC           | PSNR            | SSIM            |
|------------------------|--------------|-----------------|-----------------|
| $1\times$              | $\times$     | <b>33.15</b>    | 0.9729          |
|                        | $\checkmark$ | 33.12           | <b>0.9881</b>   |
| $3\times$              | $\times$     | 31.11           | 0.9701          |
|                        | $\checkmark$ | <b>31.11</b>    | <b>0.9738</b>   |
| $5\times$              | $\times$     | 30.79           | 0.9609          |
|                        | $\checkmark$ | <b>30.84</b>    | <b>0.9673</b>   |
| $9\times$              | $\times$     | 30.48           | <b>0.9685</b>   |
|                        | $\checkmark$ | <b>30.54</b>    | 0.9579          |
| Average Increase       |              | + <b>0.0775</b> | + <b>0.0088</b> |

shutter sharp frames contribute to  $2/3$  of the overall weight. Conversely, for a  $5\times$  frame insertion, the terminal frames account for only  $2/5$  of the weight.

#### C.10 EFFECTIVENESS OF THE DCN:

Deformable convolutions offer an effective means of modeling long-range dependencies while preserving computational efficiency. Given these advantages, we have incorporated deformable convolutions into the backbone architecture of encoding. To evaluate their impact, we conducted an ablation study, as presented in Tab. 8. Our results demonstrate an average improvement of 0.0775 *dB* in PSNR and 0.0088 in SSIM with the inclusion of deformable convolutions, highlighting their beneficial effect.

Due to the limited size of our dataset, we have introduced only one layer of deformable convolution. In contrast to the referenced research (Wang et al., 2022a), which utilized a training set of over 14.2 million samples in the training set, our dataset is comparatively smaller. The GEV training set comprises 784 samples, while the FASTEC training set consists of 1620 samples.

#### C.11 EXPLORING WHY DEBLURSR APPEARS TO CORRECT ROLLING SHUTTER:

While the primary focus of the DeblurSR (Song et al., 2023) study did not lie in the correction of the rolling shutter effect, we can observe a certain level of correction in the experiments, albeit accompanied by artifacts. We attribute this phenomenon to the fact that events themselves can be viewed as capturing a global shutter perspective. Consequently, the spiking representation learned by DeblurSR using events possesses the potential for rolling shutter correction. The effectiveness of using events to learn implicit representation for rolling shutter correction is evident.



```

671 import torch
672 import torch.nn as nn
673 from absl.logging import info
674 from egrsdb.models.unet.dcnv3_nchw import DCNv3NCHW
675
676 class _SCN(nn.Module):
677     def __init__(self, hidden_channels, high_dim_channels, is_deformable,
678         loop):
679         super(_SCN, self).__init__()
680         self.hidden_channels = hidden_channels
681         self.high_dim_channels = high_dim_channels
682         self.is_deformable = is_deformable
683         self.loop = loop
684         self.W1 = nn.Conv2d(hidden_channels, high_dim_channels, 3, 1, 1,
685             bias=False)
686         self.S1 = nn.Conv2d(high_dim_channels, hidden_channels, 3, 1, 1,
687             groups=1, bias=False)
688         self.S2 = nn.Conv2d(hidden_channels, high_dim_channels, 3, 1, 1,
689             groups=1, bias=False)
690         self.shlu = nn.ReLU(True)
691         if is_deformable:
692             self.dcn = DCNv3NCHW(channels=high_dim_channels, groups=1,
693                 offset_scale=2, act_layer="ReLU", norm_layer="LN", dw_kernel_size=3,
694                 center_feature_scale=0.25)
695
696     def forward(self, blur_image, events):
697         x1 = blur_image
698         event_input = events
699         x1 = torch.mul(x1, event_input)
700         z = self.W1(x1)
701         tmp = z
702         for i in range(self.loop):
703             ttmp = self.shlu(tmp)
704             x = self.S1(ttmp)
705             x = torch.mul(x, event_input)
706             x = torch.mul(x, event_input)
707             x = self.S2(x)
708             if self.is_deformable:
709                 x = torch.relu(x)
710                 x = self.dcn(x)
711             x = ttmp - x
712             tmp = torch.add(x, z)
713         c = self.shlu(tmp)
714         return c
715
716
717 class ESLBackBone(nn.Module):
718     def __init__(self, is_color, event_moments, hidden_channels,
719         high_dim_channels, is_deformable, loop):
720         super(ESLBackBone, self).__init__()
721         in_channel = 3 if is_color else 1
722         self.in_channel = in_channel
723         self.event_moments = event_moments
724         self.hidden_channels = hidden_channels
725         self.high_dim_channels = high_dim_channels
726         self.is_deformable = is_deformable
727         self.loop = loop
728         self.image_d = nn.Conv2d(in_channels=in_channel, out_channels=
729             self.hidden_channels, kernel_size=1, stride=1, padding=0, bias=False)
730         self.event_c1 = nn.Conv2d(in_channels=event_moments, out_channels=
731             self.hidden_channels, kernel_size=1, stride=1, padding=0, bias=False)
732         )

```

```

733         self.event_c2 = nn.Conv2d(in_channels=self.hidden_channels, 53
734         out_channels=self.hidden_channels, kernel_size=1, stride=1, padding
735         =0, bias=False)
736         self.relu = nn.ReLU(inplace=True) 54
737         self.end_conv = nn.Conv2d(in_channels=128, out_channels= 55
738         high_dim_channels, kernel_size=3, stride=1, padding=1, bias=False)
739         self.scn_1 = _SCN(hidden_channels, high_dim_channels, 56
740         is_deformable, loop)
741
742     def forward(self, events, blur_frame): 57
743         x1 = self.image_d(blur_frame) 58
744         event_out = self.event_c1(events) 59
745         event_out = torch.sigmoid(event_out) 60
746         event_out = self.event_c2(event_out) 61
747         event_out = torch.sigmoid(event_out) 62
748         out = self.scn_1(x1, event_out) 63
749         out = self.end_conv(out) 64
750         return out 65

```

Listing 1: The pytorch implementation of encoder.
